# Supplementary material for: An artificial intelligence-based first-line defence against COVID-19: digitally screening citizens for risks via a chatbot
Source: PubMed Central journal article supplement (PMC7643065; doi:10.1038/s41598-020-75912-x), 2020-11-04
Supplement: 41598_2020_75912_MOESM1_ESM.pdf [file 41598_2020_75912_MOESM1_ESM.pdf]

# An artificial intelligence-based first-line defence against COVID-19: digitally screening citizens for risks via a chatbot

Alistair Martin<sup>1,+</sup>, Jama Nateqi<sup>2,3,+,\*</sup>, Stefanie Gruarin<sup>2</sup>, Nicolas Munsch<sup>1</sup>, Isselmou Abdarahmane<sup>1</sup>, Marc Zobel<sup>1</sup>, and Bernhard Knapp<sup>1</sup>

<sup>1</sup>Symptoma, Data Science Department, Vienna, Austria

<sup>2</sup>Symptoma, Medical Department, Attersee, Austria

<sup>3</sup>Department of Internal Medicine, Paracelsus Medical University, Salzburg, Austria

+these authors contributed equally to this work

\*science@symptoma.com

## Supplementary Information

### Symptom Frequencies

|             | COVID-19 | Common cold | Influenza | Hay fever |
|-------------|----------|-------------|-----------|-----------|
| Fever       | 87.9 [1] | 15 [3]      | 68 [6]    | –         |
| Fatigue     | 38.1 [1] | 42 [4]      | 94 [6]    | –         |
| Dry cough   | 67.7 [1] | 80 [3]      | 93 [6]    | 22 [10]   |
| Sneezing    | –        | 74 [4]      | 58 [7]    | 96 [11]   |
| Malaise     | 14.8 [1] | 30 [4]      | 94 [6]    | –         |
| Rhinorrhea  | 4 [2]    | 95 [3]      | 91 [6]    | 62.1 [12] |
| Sore throat | 13.9 [1] | 70 [3]      | 84 [6]    | 30 [10]   |
| Diarrhea    | 3.7 [1]  | 11 [4]      | 14.4 [8]  | –         |
| Headache    | 13.6 [1] | 80 [5]      | 91 [6]    | 50 [13]   |
| Dyspnea     | 18.6 [1] | 21 [4]      | 63 [9]    | –         |

**Table S1.** Symptom frequencies as extracted from the literature.

[1] <https://www.who.int/docs/default-source/coronaviruse/who-china-joint-mission-on-covid-19-final-report.pdf>

[2] <https://www.thelancet.com/action/showPdf?pii=S0140-6736%2820%2930211-7>

[3] <https://www.sciencedirect.com/science/article/pii/S0095454305703559?via%3Dihub>

[4] <https://www.ncbi.nlm.nih.gov/pubmed/3057962>

[5] <https://www.ncbi.nlm.nih.gov/pmc/articles/PMC4347877/pdf/nihms658637.pdf>

[6] <https://jamanetwork.com/journals/jamainternalmedicine/fullarticle/485554>

[7] <https://www.ncbi.nlm.nih.gov/pmc/articles/PMC4915903/>

[8] <https://www.ncbi.nlm.nih.gov/pmc/articles/PMC4676820/>

[9] <https://www.ncbi.nlm.nih.gov/pmc/articles/PMC3650195/>

[10] <https://www.ncbi.nlm.nih.gov/pubmed/10971479>

[11] <https://www.ncbi.nlm.nih.gov/pmc/articles/PMC5806744/>

[12] [https://www.researchgate.net/publication/307953143\\_Inverse\\_correlation\\_of\\_soluble\\_programmed\\_cell\\_death-1\\_ligand-1\\_sPD-L1\\_with\\_eosinophil\\_count\\_and\\_clinical\\_severity\\_in\\_allergic\\_rhinitis\\_patients](https://www.researchgate.net/publication/307953143_Inverse_correlation_of_soluble_programmed_cell_death-1_ligand-1_sPD-L1_with_eosinophil_count_and_clinical_severity_in_allergic_rhinitis_patients)

[13] <https://www.ncbi.nlm.nih.gov/pubmed/17300360>

## COVID-19 Case Reports

| Case ID                | Source                                                                                                                                                                                                                                                                                                                             |
|------------------------|------------------------------------------------------------------------------------------------------------------------------------------------------------------------------------------------------------------------------------------------------------------------------------------------------------------------------------|
| 3007                   | Zhang X, Song W, Liu X, Lyu L. CT image of novel coronavirus pneumonia: a case report. <i>Jpn J Radiol.</i> 2020 Mar 18. doi: 10.1007/s11604-020-00945-1.                                                                                                                                                                          |
| 3006, 2987, 2986, 2985 | Wang Z, Chen X, Lu Y, Chen F, Zhang W. Clinical characteristics and therapeutic procedure for four cases with 2019 novel coronavirus pneumonia receiving combined Chinese and Western medicine treatment. <i>Biosci Trends.</i> 2020 Mar 16;14(1):64-68. doi: 10.5582/bst.2020.01030.                                              |
| 3005                   | Thevarajan I, Nguyen THO, Koutsakos M, et al. Breadth of concomitant immune responses prior to patient recovery: a case report of non-severe COVID-19. <i>Nat Med.</i> 2020. doi: 10.1038/s41591-020-0819-2                                                                                                                        |
| 3004                   | Ng K, Poon BH, Kiat Puar TH, et al. COVID-19 and the Risk to Health Care Workers: A Case Report. <i>Ann Intern Med.</i> 2020. doi: 10.7326/L20-0175                                                                                                                                                                                |
| 3003, 3002             | Chen L, Liu W, Zhang Q, et al. RNA based mNGS approach identifies a novel human coronavirus from two individual pneumonia cases in 2019 Wuhan outbreak. <i>Emerg Microbes Infect.</i> 2020 Feb 5;9(1):313-319. doi: 10.1080/22221751.2020.1725399                                                                                  |
| 3001, 2997             | Lin X, Gong Z, Xiao Z, Xiong J, Fan B, Liu J. Novel Coronavirus Pneumonia Outbreak in 2019: Computed Tomographic Findings in Two Cases. <i>Korean J Radiol.</i> 2020 Mar;21(3):365-368. doi: 10.3348/kjr.2020.0078                                                                                                                 |
| 3000                   | Lim J, Jeon S, Shin HY, et al. Case of the Index Patient Who Caused Tertiary Transmission of COVID-19 Infection in Korea: the Application of Lopinavir/Ritonavir for the Treatment of COVID-19 Infected Pneumonia Monitored by Quantitative RT-PCR. <i>J Korean Med Sci.</i> 2020 Feb 17;35(6):e79. doi: 10.3346/jkms.2020.35.e79. |
| 2999                   | Park WB, Kwon NJ, Choi SJ et al. Virus Isolation from the First Patient with SARS-CoV-2 in Korea. <i>J Korean Med Sci.</i> 2020 Feb 24;35(7):e84. doi: 10.3346/jkms.2020.35.e84.                                                                                                                                                   |
| 2998                   | An P, Song P, Lian K, Wang Y. CT Manifestations of Novel Coronavirus Pneumonia: A Case Report. <i>Balkan Med J.</i> 2020 Mar 6. doi: 10.4274/balkanmedj.galenos.2020.2020.2.15.                                                                                                                                                    |
| 2996                   | Wei J, Xu H, Xiong J, et al. 2019 Novel Coronavirus (COVID-19) Pneumonia: Serial Computed Tomography Findings. <i>Korean J Radiol.</i> 2020 Apr;21(4):501-504. doi: 10.3348/kjr.2020.0112.                                                                                                                                         |
| 2995                   | Zhu L, Xu X, Ma K, et al. Successful recovery of COVID-19 pneumonia in a renal transplant recipient with long-term immunosuppression. <i>Am J Transplant.</i> 2020 Mar 17. doi: 10.1111/ajt.15869.                                                                                                                                 |
| 2994                   | Wang S, Guo L, Chen L, et al. A case report of neonatal COVID-19 infection in China. <i>Clin Infect Dis.</i> 2020 Mar 12. pii: ciaa225. doi: 10.1093/cid/ciaa225.                                                                                                                                                                  |
| 2993                   | Chen D, Xu W, Lei Z, et al. Recurrence of positive SARS-CoV-2 RNA in COVID-19: A case report. <i>Int J Infect Dis.</i> 2020 Mar 5. pii: S1201-9712(20)30122-3. doi: 10.1016/j.ijid.2020.03.003.                                                                                                                                    |
| 2992                   | Xu Z, Shi L, Wang Y, et al. Pathological findings of COVID-19 associated with acute respiratory distress syndrome. <i>Lancet Respir Med.</i> 2020 Feb 18. pii: S2213-2600(20)30076-X. doi: 10.1016/S2213-2600(20)30076-X.                                                                                                          |
| 2991                   | Kim JY, Ko JH, Kim Y, et al. Viral Load Kinetics of SARS-CoV-2 Infection in First Two Patients in Korea. <i>J Korean Med Sci.</i> 2020 Feb 24;35(7):e86. doi: 10.3346/jkms.2020.35.e86.                                                                                                                                            |
| 2990, 2989, 2988       | Bernard Stoecklin S, Rolland P, Silue Y, et al. First cases of coronavirus disease 2019 (COVID-19) in France: surveillance, investigations and control measures, January 2020. <i>Euro Surveill.</i> 2020 Feb;25(6). doi: 10.2807/1560-7917.ES.2020.25.6.2000094.                                                                  |
| 2984                   | Shi H, Han X, Zheng C. Evolution of CT Manifestations in a Patient Recovered from 2019 Novel Coronavirus (2019-nCoV) Pneumonia in Wuhan, China. <i>Radiology.</i> 2020 Apr;295(1):20. doi: 10.1148/radiol.2020020269.                                                                                                              |
| 2983, 2982             | Fang Y, Zhang H, Xu Y, Xie J, Pang P, Ji W. CT Manifestations of Two Cases of 2019 Novel Coronavirus (2019-nCoV) Pneumonia. <i>Radiology.</i> 2020 Apr;295(1):208-209. doi: 10.1148/radiol.2020020280.                                                                                                                             |
| 2981                   | Liu P, Tan XZ. 2019 Novel Coronavirus (2019-nCoV) Pneumonia. <i>Radiology.</i> 2020 Apr;295(1):19. doi: 10.1148/radiol.2020020257.                                                                                                                                                                                                 |
| 2980                   | Lei J, Li J, Li X, Qi X. CT Imaging of the 2019 Novel Coronavirus (2019-nCoV) Pneumonia. <i>Radiology.</i> 2020 Apr;295(1):18. doi: 10.1148/radiol.2020020236.                                                                                                                                                                     |
| 2979                   | Park JY, Han MS, Park KU, Kim JY, Choi EH. First Pediatric Case of Coronavirus Disease 2019 in Korea. <i>J Korean Med Sci.</i> 2020 Mar 23;35(11):e124. doi: 10.3346/jkms.2020.35.e124.                                                                                                                                            |
| 2978                   | Hosoda T, Sakamoto M, Shimizu H, Okabe N. SARS-CoV-2 enterocolitis with persisting to excrete the virus for about two weeks after recovering from diarrhea: A case report. <i>Infect Control Hosp Epidemiol.</i> 2020 Mar 19:1-4. doi: 10.1017/ice.2020.87.                                                                        |

## Symptoma userbase captures virus diffusion

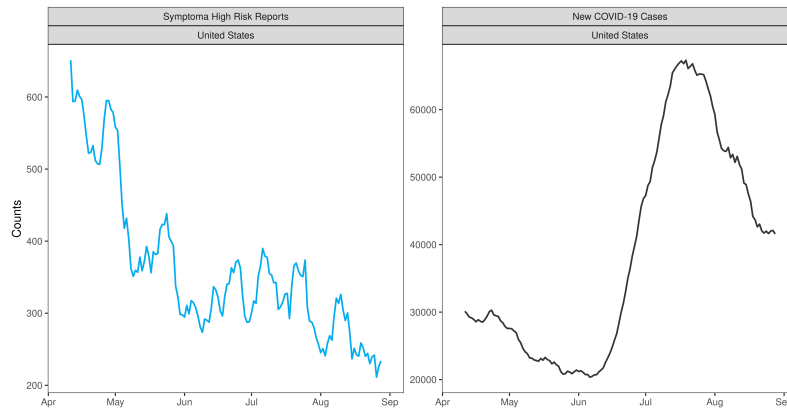

**Figure S1.** New cases of COVID-19 reported within the United States compared to the number of COVID-19 online tests labelled as high-risk by Symptoma. The time-series are shown for the period 2020-04-11 to 2020-08-28 and the Pearson correlation coefficient is  $-0.368$ .
